# Supplementary material for: Nitric acid: modeling osmotic coefficients and acid–base dissociation using the BIMSA theory
Source: Royal Society of Chemistry journal article supplement (doi:10.1039/c0dt00343c), 2010-01-01
Supplement: c0dt00343c.pdf [file c0dt00343c.pdf]

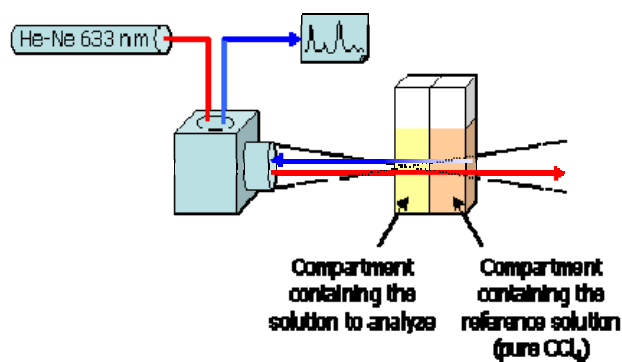

Fig. S1 Scheme of the Raman measurements in confocal mode using a two-compartment cell

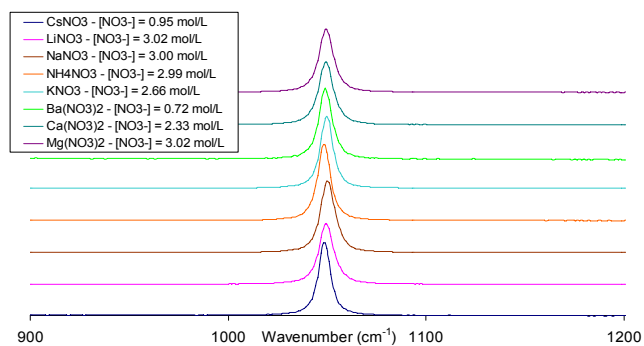

Fig. S2 Experimental Raman spectra of different nitrate salts. Intensity normalized to 1 mol.L<sup>-1</sup>

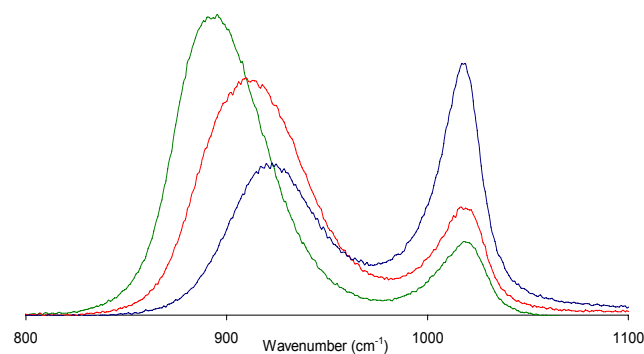

Fig. S3 Experimental Raman spectra within the 800-1100 cm<sup>-1</sup> region of 15.2 mol.L<sup>-1</sup> (blue), 18.9 mol.L<sup>-1</sup> (red) and 24 mol.L<sup>-1</sup> (green) nitric acid solutions

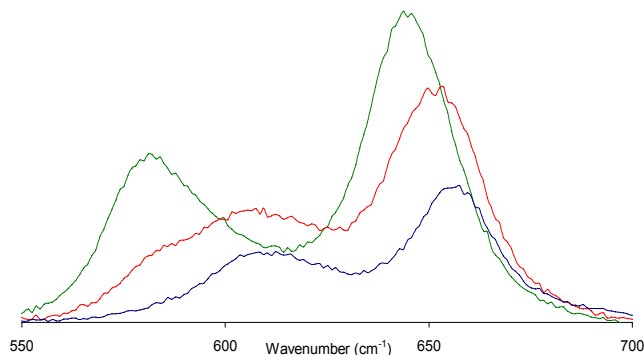

Fig. S4 Experimental Raman spectra within the 550-700 cm<sup>-1</sup> region of 15.2 mol.L<sup>-1</sup> (blue), 18.9 mol.L<sup>-1</sup> (red) and 24 mol.L<sup>-1</sup> (green) nitric acid solutions
